# Supplementary material for: Next-generation sequencing shows the genomic features of ovarian clear cell cancer and compares the genetic architectures of high-grade serous ovarian cancer and clear cell carcinoma in ovarian and endometrial tissues
Source: PeerJ journal article supplement (doi:10.7717/peerj.14653), 2023-01-26

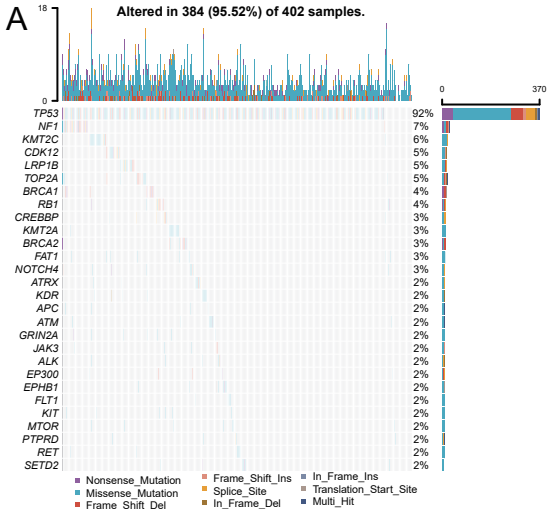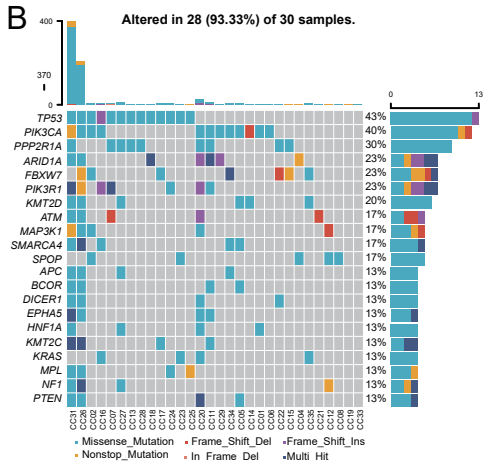

Supplement: Sup_Figure_1.pdf [file Sup_Figure_1.pdf]
